# Supplementary material for: Charge transfer tuning in TiO2hybrid nanostructures with acceptor–acceptor systems
Source: Royal Society of Chemistry journal article supplement (doi:10.1039/c6tc05190a), 2017-01-01
Supplement: c6tc05190a1.pdf [file c6tc05190a1.pdf]

## Electronic Supporting Information

### Charge transfer tuning in TiO<sub>2</sub> hybrid nanostructures with acceptor-acceptor systems

*Kacper Pilarczyk, Kornelia Lewandowska, Krzysztof Mech, Michał Kawa, Marta Gajewska, Bolesław Barszcz, Andrzej Bogucki, Agnieszka Podborska,\* Konrad Szaciłowski\**

\*e-mails: [podborsk@agh.edu.pl](mailto:podborsk@agh.edu.pl) (Agnieszka Podborska), [szacilow@agh.edu.pl](mailto:szacilow@agh.edu.pl) (Konrad Szaciłowski)

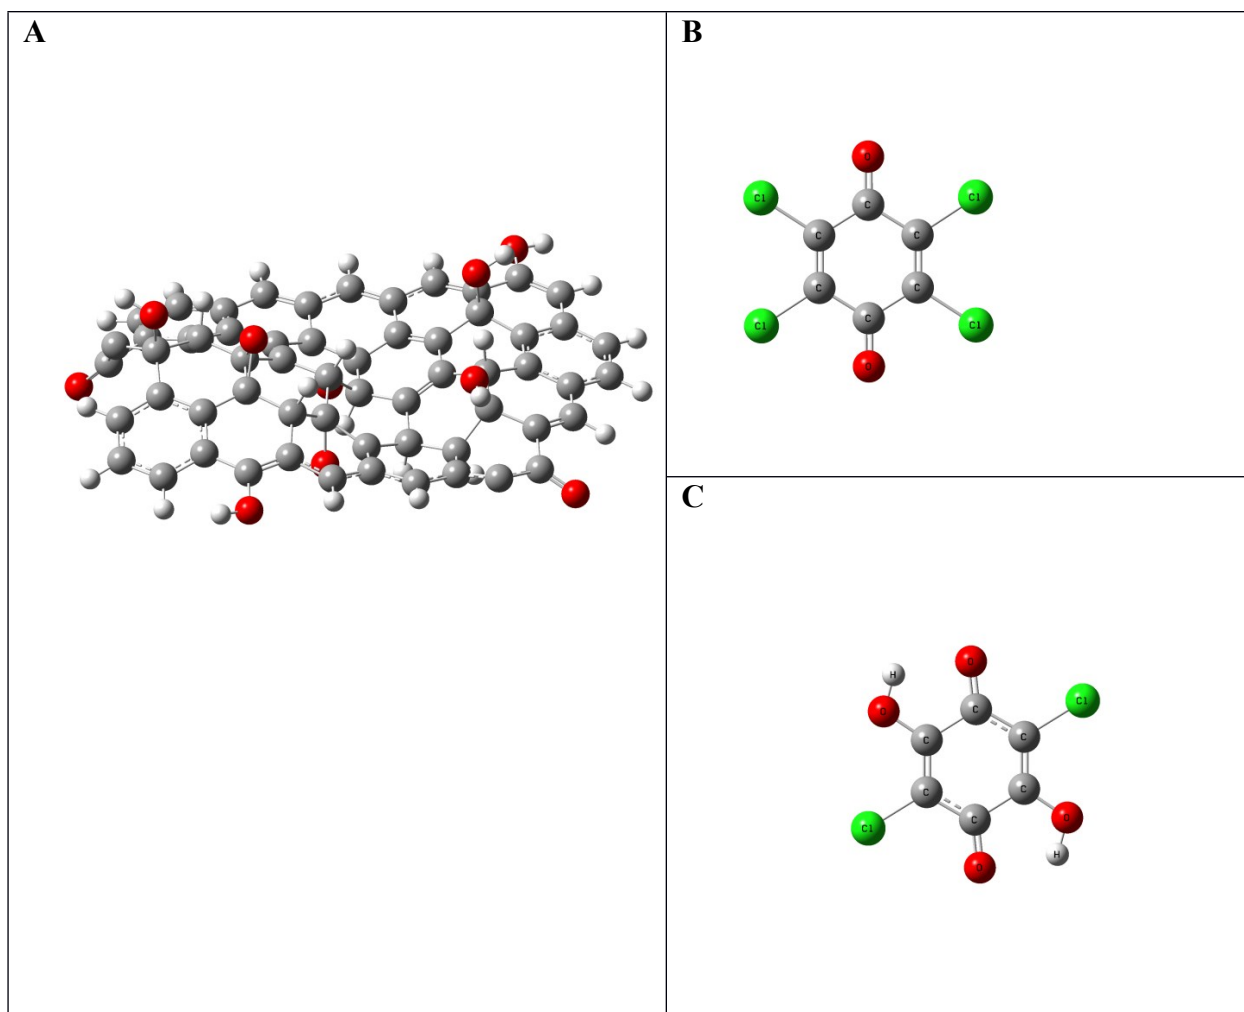

**Scheme S1.** The optimal configurations of GO (A), CLA (B) and KCLA (C).

**Table S1.** The calculated and experimental frequencies for CLA and CLA/GO dyad.

| Theory<br>(cm <sup>-1</sup> ) | Raman<br>(cm <sup>-1</sup> ) |                  | IR<br>(cm <sup>-1</sup> ) |        | Approximate description                        |
|-------------------------------|------------------------------|------------------|---------------------------|--------|------------------------------------------------|
| CLA                           | CLA                          | CLA/GO           | CLA                       | CLA/GO |                                                |
| 194                           | 200                          | 199              |                           |        | C-Cl scissoring                                |
| 319                           | 328                          | 328              |                           |        | C-C-C bending (ring breathing)                 |
| 491                           | 494                          | 494              |                           |        | C-C-Cl bending                                 |
| 695                           |                              |                  | 713                       | 713    | C-Cl stretching                                |
| 750                           |                              |                  | 749                       | 749    | C-C-C bending out of plane                     |
| 820                           | 776                          | 778              |                           |        | C-Cl stretching asymmetric (+ring deformation) |
| 900                           |                              |                  | 906                       | 906    | C-C-C scissoring                               |
| 981                           | 1006                         | 1008             |                           |        | C-Cl stretching symmetric (+ring deformation)  |
| 1107                          |                              |                  | 1111                      | 1110   | C-C stretching + C-Cl stretching               |
| 1232                          |                              |                  | 1235                      | 1235   | C-C stretching                                 |
|                               |                              | 1333             |                           |        | D band                                         |
| 1252                          | 1246                         | 1248             |                           |        | C-C stretching asymmetric                      |
|                               |                              | 1597             |                           |        | G band                                         |
| 1634                          |                              |                  | 1647                      | 1650   | C=C stretching asymmetric                      |
| 1667                          | 1610<br>and 1691             | 1610<br>and 1691 |                           |        | C=C + C=O stretching symmetric                 |
| 1683                          |                              |                  | 1680                      | 1680   | C=O stretching asymmetric                      |

**Table S2.** The calculated and experimental frequencies for KCLA and KCLA/GO dyad.

| Theory<br>(cm <sup>-1</sup> ) | Raman<br>(cm <sup>-1</sup> ) |         | IR<br>(cm <sup>-1</sup> ) |         | Approximate description                                    |
|-------------------------------|------------------------------|---------|---------------------------|---------|------------------------------------------------------------|
| KCLA                          | KCLA                         | KCLA/GO | KCLA                      | KCLA/GO |                                                            |
| 209                           | 239                          |         |                           |         | C-C-Cl rocking                                             |
| 285                           | 287                          | 282     |                           |         | Ring deformation                                           |
| 377                           | 377                          | 335     |                           |         | C-C-O bending                                              |
| 424                           | 408                          | 390     |                           |         | C-C-C bending                                              |
| 533                           | 542                          |         |                           |         | C-C-C bending                                              |
| 547                           |                              |         |                           |         | C-Cl stretching + ring deformation                         |
| 617                           |                              |         | 636                       | 636     | C-C-C bending out of plane +<br>C-C-O bending out of plane |
| 704                           |                              |         |                           |         | O-H wagging                                                |
| 753                           |                              |         | 753                       | 752     | C-C-C bending out of plane                                 |
| 771                           | 787                          |         |                           |         | C-C-C bending out of plane                                 |
| 831                           |                              |         | 841                       | 840     | C-Cl stretching asymmetric                                 |
| 893                           | 913                          |         |                           |         | C-Cl stretching                                            |
| 977                           |                              |         | 980                       | 980     | C-C stretching asymmetric                                  |
| 1243                          | 1244                         |         |                           |         | C-Cl stretching + C-O-H bending +<br>C-C stretching        |
| 1247                          |                              |         | 1270                      | 1260    | C-O-H bending +<br>C-Cl stretching asymmetric              |
| 1269                          | 1278                         |         |                           |         | C-O stretching                                             |
| 1332                          |                              |         | 1362                      | 1265    | C-O-H bending + C-O stretching                             |
|                               |                              | 1333    |                           |         | D band                                                     |
| 1375                          | 1380                         |         |                           |         | C-C stretching + C-O-H bending                             |
|                               |                              | 1597    |                           |         | G band                                                     |
| 1647                          | 1651                         |         |                           |         | C=O stretching symmetric                                   |
| 1662                          |                              |         | 1666                      | 1664    | C=O stretching asymmetric                                  |
| 1711                          |                              |         |                           |         | C=C stretching asymmetric                                  |
| 1733                          | 1675                         | 1682    |                           |         | C=C stretching symmetric                                   |
| 3442                          |                              |         | 3304                      | 3304    | O-H stretching with hydrogen bonds                         |

It is well established that the D band results from a breathing mode of  $\kappa$ -point photons of  $A_{1g}$  symmetry, while the G band arises due to the first order scattering of the  $E_{2g}$  phonons of  $sp^2$  C atoms.<sup>47</sup> The most prominent bands in the CLA spectra may be related to the C=C bond stretching ( $1691\text{ cm}^{-1}$  and  $1610\text{ cm}^{-1}$ ) and C-C-Cl bond bending ( $494\text{ cm}^{-1}$ ). There are also some less intensive bands which can be assigned to the specific vibrations of the CLA molecule. In the Raman spectrum of CLA/GO dyad we can identify those characteristic signals coming from CLA at almost the same Raman Shifts as in the case of pure CLA which indicates small or no interactions between CLA and GO. The presence of GO in CLA/GO system is confirmed by the appearance of the D band at  $1333\text{ cm}^{-1}$  and the G band at around  $1594\text{ cm}^{-1}$ . The G band is superimposed on the C=C stretching band at  $1610\text{ cm}^{-1}$  so its position is less precisely defined. The Raman D/G intensity ratio (ID/IG) is proportional to the average size of  $sp^2$  domains.<sup>49</sup> The CLA/GO has the same ID/IG value (1.20) as pure GO which is associated with the efficient protection of hydroxyl and epoxy groups in GO.

The experimental Raman spectra of pure KCLA agree relatively good with the calculation results. The most intensive bands are observed at  $1651\text{ cm}^{-1}$  and  $542\text{ cm}^{-1}$  and they are related to the C=O stretching and C-C-C bending vibrations, respectively. Less intensive signals can be also assigned to the specific vibrations within KCLA molecule (Table S2). The positions of the observed Raman lines are consistent with the results obtained by Pawluko $\acute{J}$ c et. al.<sup>50</sup>, however the assignment of some bands to the specific vibrations is slightly different in our case. The spectrum of KCLA/GO dyad, when compared to the spectrum of pure KCLA, shows almost no bands except for the D and the G bands at  $1333$  and  $1597\text{ cm}^{-1}$  originating from the GO vibrations. The Raman D/G intensity ratio (D/G) of KCLA/GO has a higher D/G value (2.21) compared to that of GO (1.14) and CLA/GO (1.20) suggesting

a partial restoration of the  $\pi$ -conjugated structures in the GO nanosheets or strong coupling between the  $\pi$ -orbitals of both partners. The additional bands observed in the spectrum recorded for KCLA/GO (after magnification by a factor of 20) at 282, 335 and 1682  $\text{cm}^{-1}$  can be related to the vibrations within the KCLA molecule. However, if we compare the positions of those bands in the spectrum of KCLA/GO with those in the spectrum of pure KCLA we can notice that they are significantly shifted which indicates a stronger interaction between KCLA and GO than between CLA and GO.

The FT-IR spectrum obtained for GO exhibits typically observed stretching vibration peaks of O-H bands at approximately 3357  $\text{cm}^{-1}$ , C=O at 1731  $\text{cm}^{-1}$ , C-O-C at 1223  $\text{cm}^{-1}$  and C-O at 1050 and approximately 1365  $\text{cm}^{-1}$ .<sup>1, 2</sup> It is relatively easy to identify the bands characteristic for CLA vibrations in the spectrum of CLA/GO dyad. Similarly to the Raman spectra their positions are only slightly changed.

In the case of KCLA the significant differences between calculated and experimental spectra are noticed in the region of 1200-1400  $\text{cm}^{-1}$  where the C-O-H bending vibrations are observed. This include some differences in intensities, width and number of bands. It is a clear suggestion that in a real material those bonds strongly interact with the environment. The simulated spectrum was calculated for an isolated molecule and all such interactions were neglected. This is probably the reason why we observe more signals in the experimental result. On the other hand, the bands recorded in this region by Pawlukojć et. al.<sup>3</sup> are also wider and more intense than calculated ones.

In the following paragraph we present data for organic compounds discussed in the manuscript, graphene oxide and dyads made of both aforementioned systems. The results include the UV-Vis absorbance spectra, the emission spectra and the deconvoluted Raman spectra in the range where the D and the G bands are recorded. The first two show no new interactions between GO and quinone derivatives. However, the thorough analysis of the latter reveals variations in the D/G ratio, which may be interpreted as an evidence for some interplay between both entities.

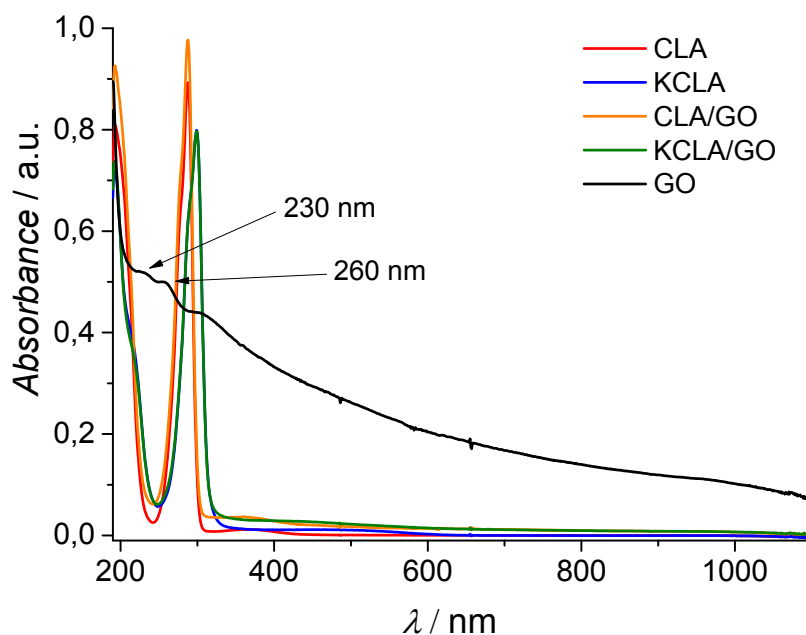

**Fig. S1.** The absorbance spectra of quinone derivatives, dyads with graphene oxide and GO without molecular modifier (in a higher concentration – refer to the experimental section). For clarity reasons the GO spectrum was multiplied by the factor of 2.

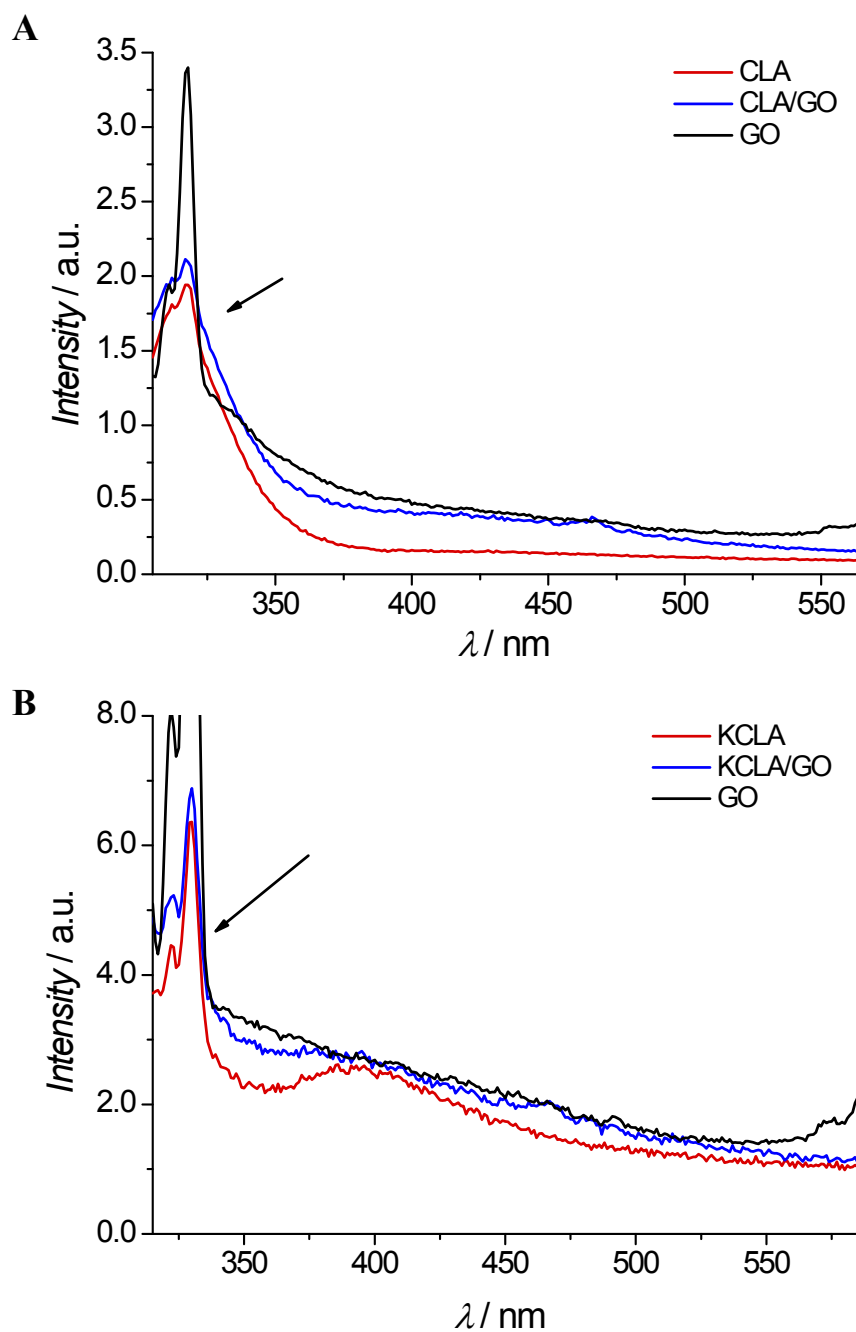

**Fig. S2.** The emission spectra of quinone derivatives, dyads with graphene oxide and GO in acetonitrile solution. The samples were excited at 290 nm (A) and 300 nm (B) which corresponds to the absorption peaks recorded for CLA and KCLA respectively.



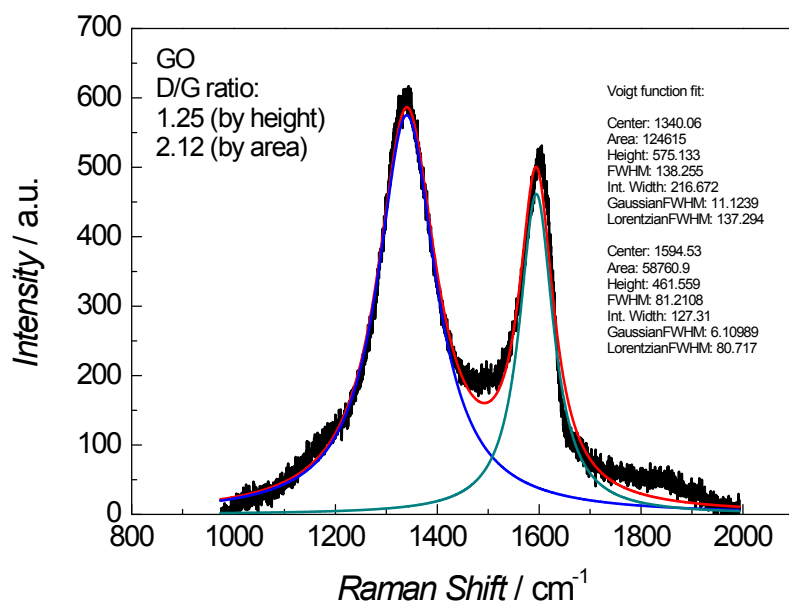

**Fig. S3.** The deconvolution done for the D and the G bands recorded in the Raman spectrum of GO sample.

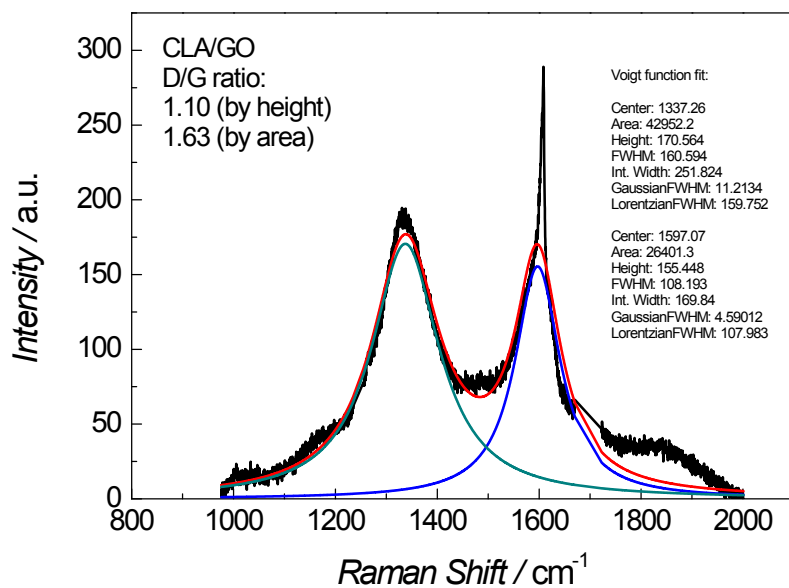

**Fig. S4.** The deconvolution done for the D and the G bands recorded in the Raman spectrum of CLA/GO sample.

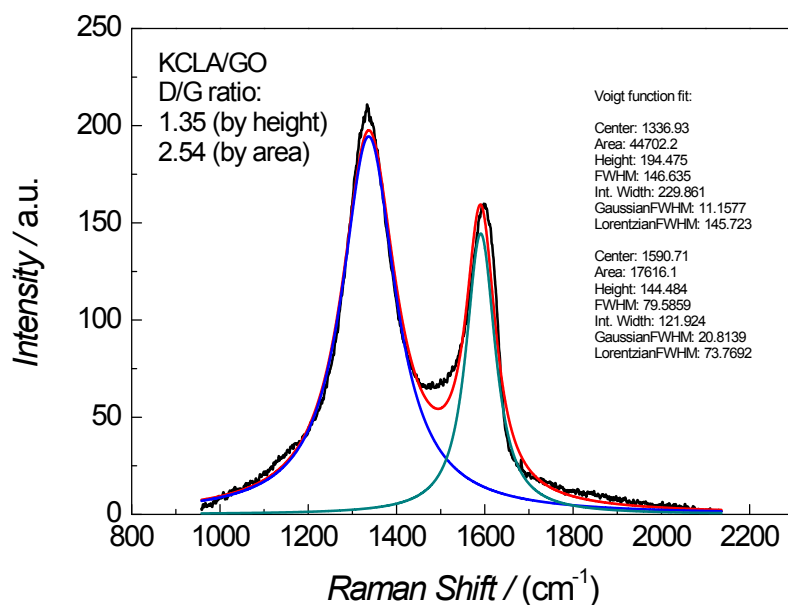

**Fig. S5.** The deconvolution done for the D and the G bands recorded in the Raman spectrum of KCLA/GO sample.

The morphology and the crystal structure of hybrids were investigated. In the next figure the X-ray diffractograms for titanium dioxide, cadmium sulphide and their composites with graphene oxide are presented. Authors postulated no significant changes in XRD patterns should emerge upon the addition of organic modifiers. One may notice a slight increase in the signal intensity at approximately  $8^\circ$  in the case of the GO/CdS system. That may be attributed to the presence of graphene oxide in the sample.

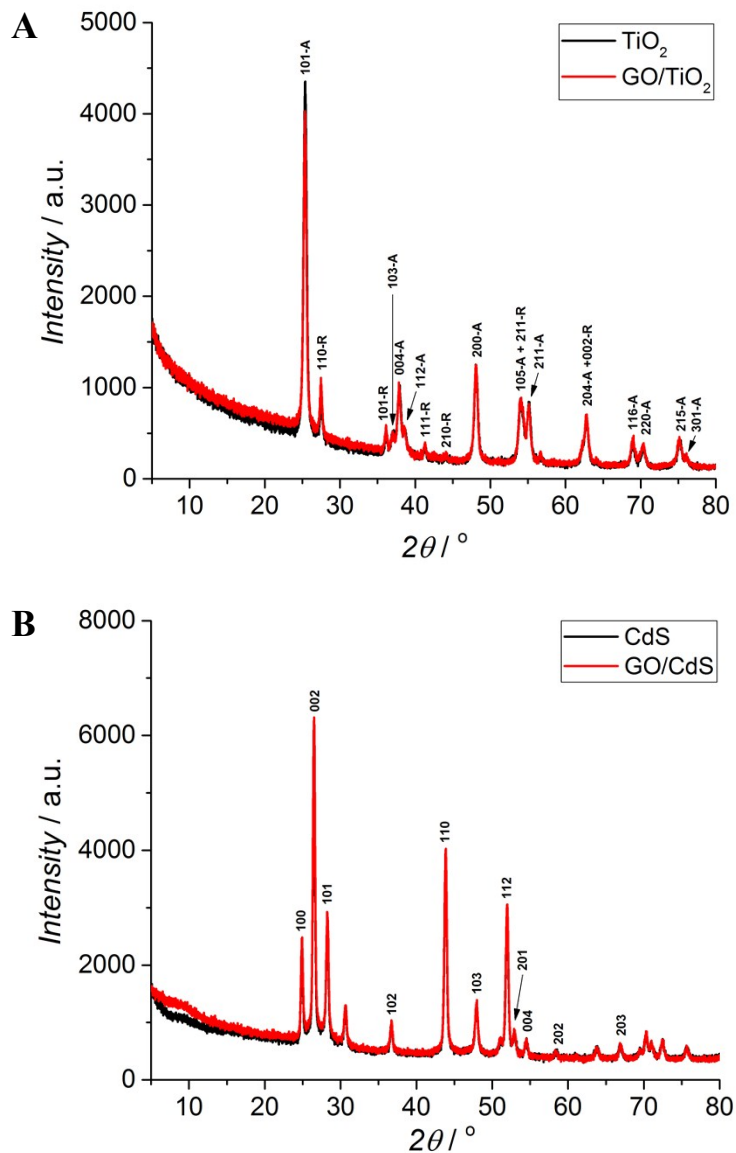

**Fig. S6.** The XRD patterns recorded for neat  $\text{TiO}_2$ , its hybrid with GO (A), neat CdS and its hybrid with GO (B).

We also demonstrate how the addition of various modifiers influences the reflectance and ATR-IR spectra recorded for cadmium sulphide-based hybrids. It seems that due to the electronic configuration of cadmium cations –  $[\text{Kr}]4d^{10}$ , whereas for titanium cations in  $\text{TiO}_2$  the configuration can be described as  $[\text{Ar}]3d^0$  – no strong coupling arise upon modification of CdS nanoparticles and the UV-Vis spectra are unaffected. At the same time, some minor variations

between IR spectra may be noticed – particularly for the CLA/CdS sample (a band at approx. 1560  $\text{cm}^{-1}$  which can be attributed to the presence of CLA – cf. Figure 1 in the manuscript) – but they are irrelevant for the further analysis.

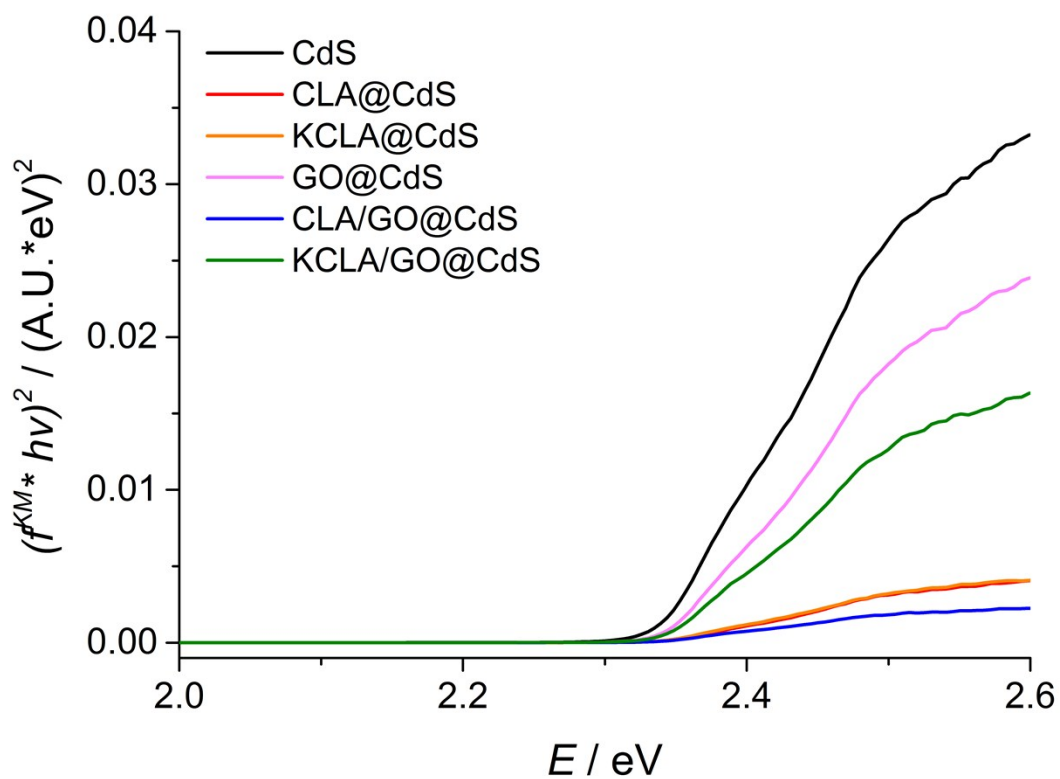

**Fig. S7.** The Tauc plots for cadmium sulphide and the hybrid materials containing CdS.

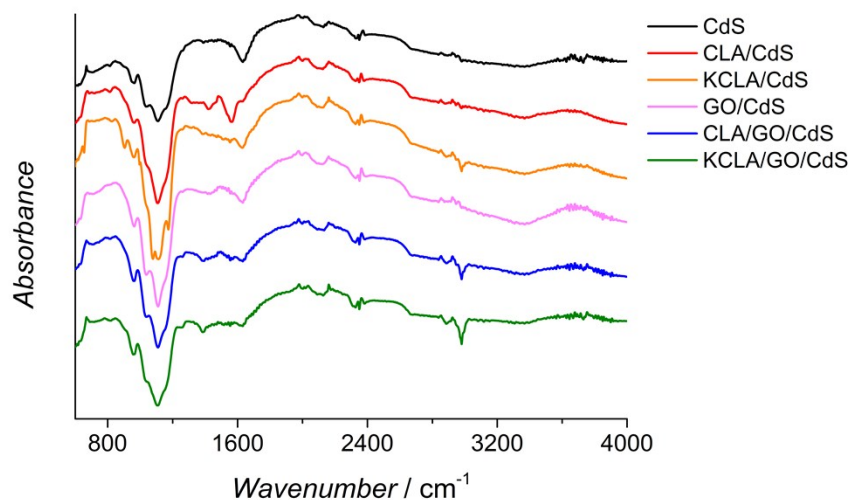

**Fig. S8.** The ATR-IR spectra of CdS hybrids with quinone derivatives, dyads with graphene oxide and GO deposited onto diamond crystal.

In the following section we present the photocurrent action spectra recorded for other systems and under various experimental conditions. The main goal is to show that the investigated oxides are almost completely unaffected by the presence of molecular oxygen in electrolyte. We would also like to point out that not only KCLA-based hybrids are strongly influenced by the addition of graphene oxide – the photocurrent response of CLA-containing materials also undergo some alterations. Finally, we wanted to present how other semiconductors (particularly other than oxides) are modified by the examined acceptor-acceptor dyads.

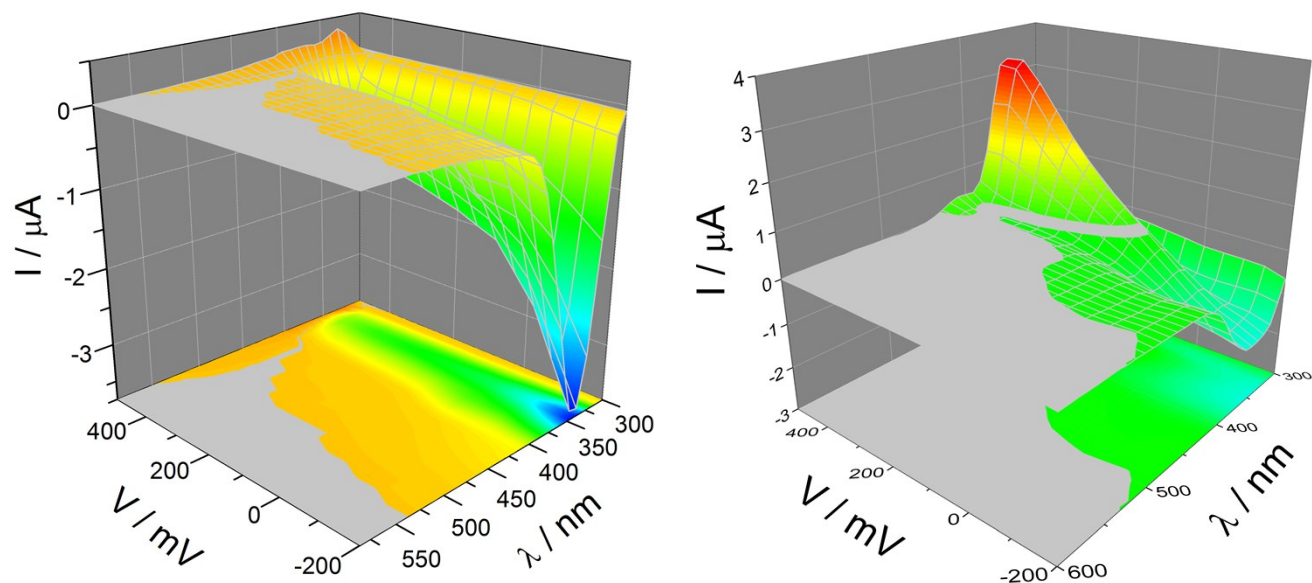

**Fig. S9.** The photocurrent action spectra recorded at different potential steps for  $\text{TiO}_2$  modified with KCLA (left) or KCLA/GO dyadic modifier (right) in 0.1 M  $\text{KNO}_3$  under  $\text{O}_2$ .

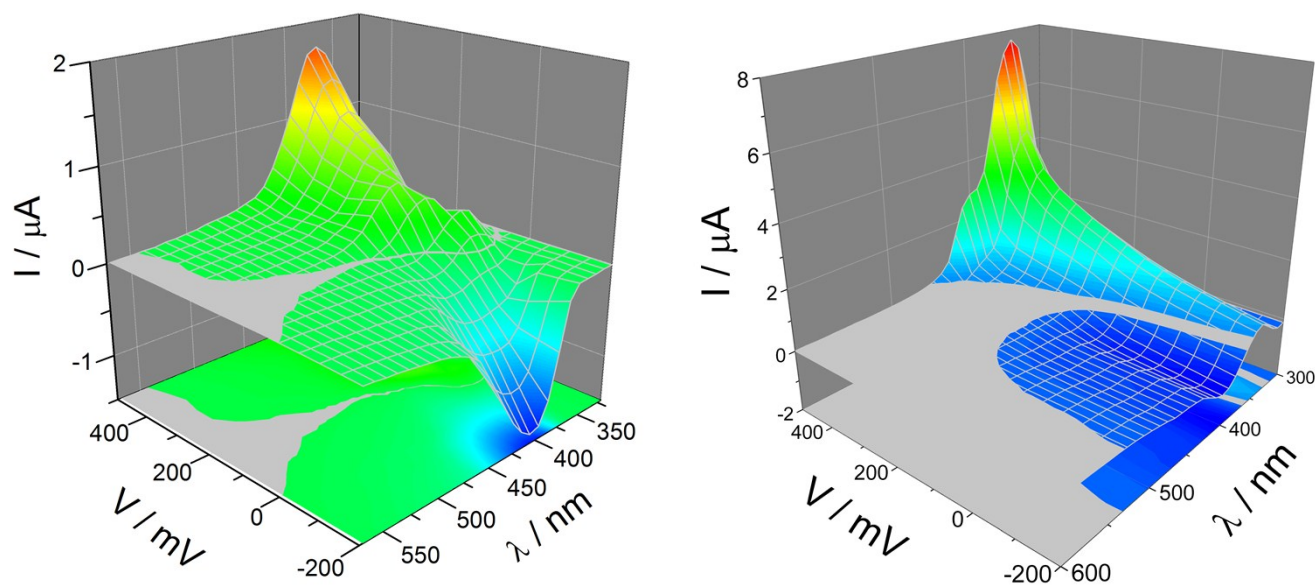

**Fig. S10.** The photocurrent action spectra recorded at different potential steps for  $\text{TiO}_2$  modified with CLA (left) or CLA/GO dyadic modifier (right) in 0.1 M  $\text{KNO}_3$  under Ar.

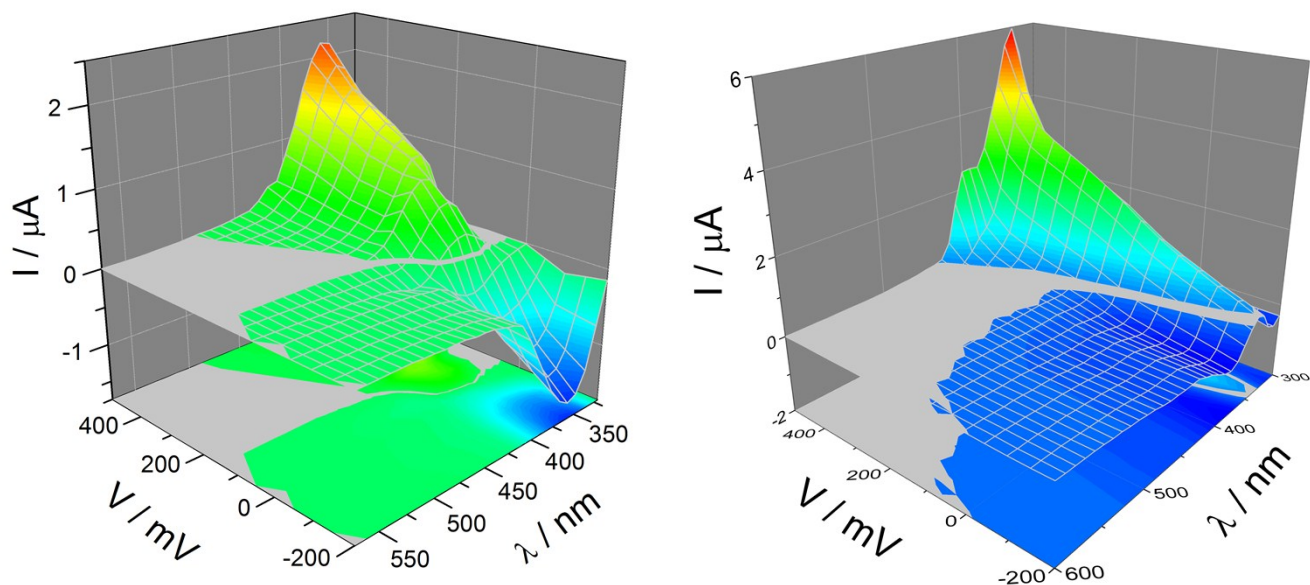

**Fig. S11.** The photocurrent action spectra recorded at different potential steps for  $\text{TiO}_2$  modified with CLA (left) or CLA/GO dyadic modifier (right) in 0.1 M  $\text{KNO}_3$  under  $\text{O}_2$ .

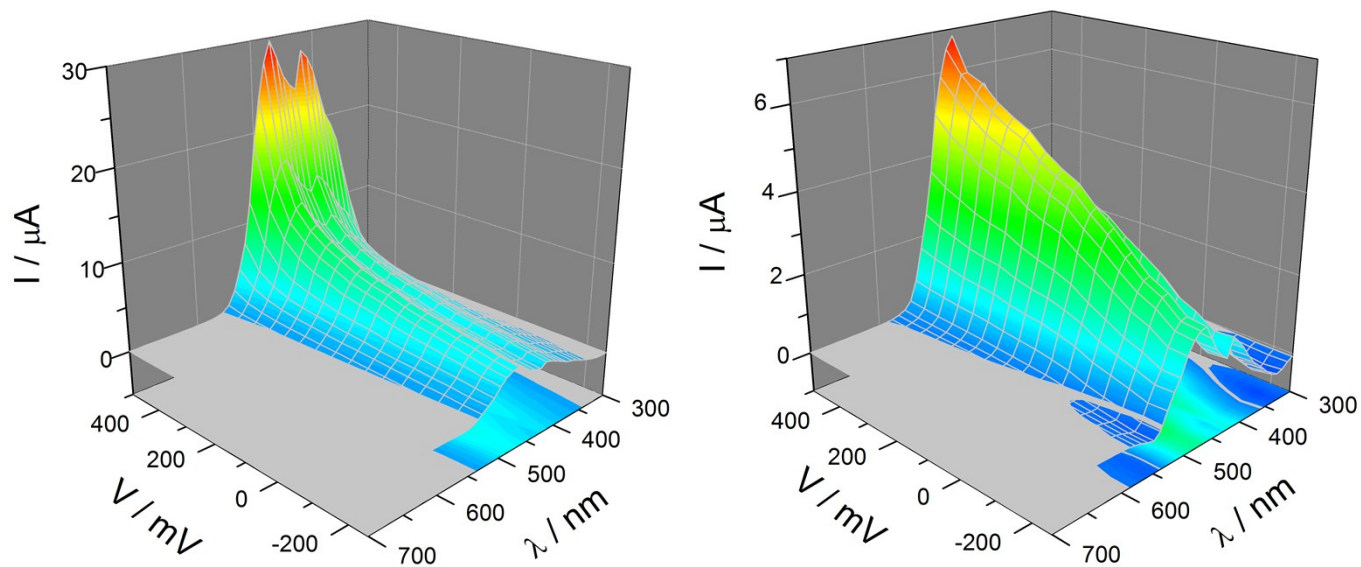

**Fig. S12.** The photocurrent action spectra recorded at different potential steps for  $\text{CdS}$  modified with KCLA (left) or KCLA/GO dyadic modifier (right) in 0.1 M  $\text{KNO}_3$  under Ar.



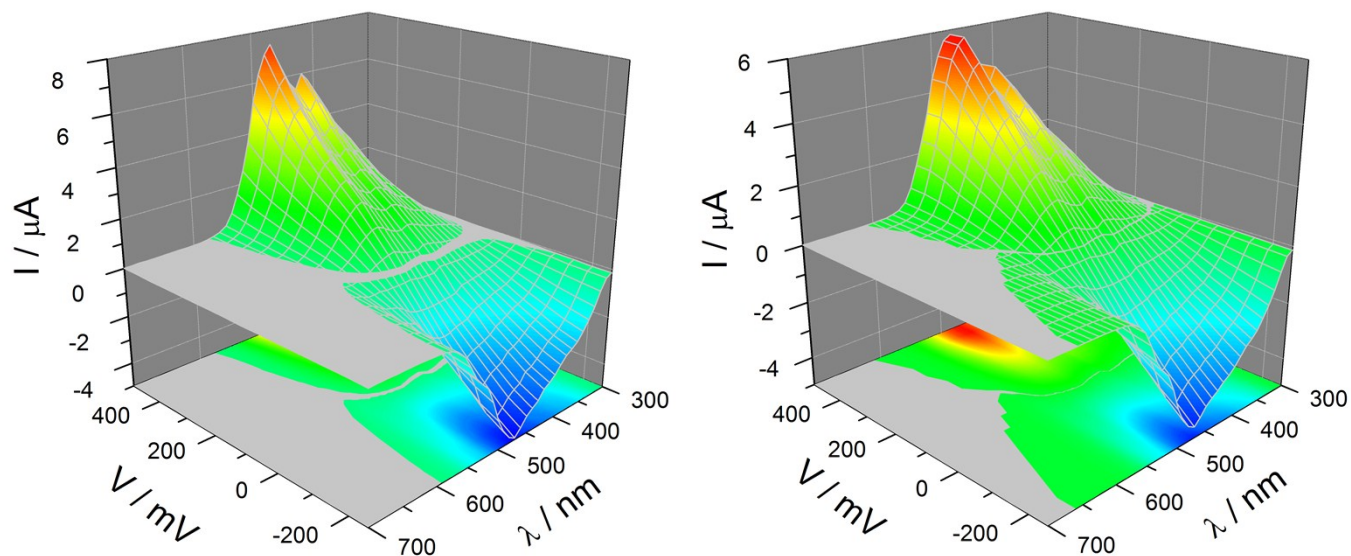

**Fig. S13.** The photocurrent action spectra recorded at different potential steps for CdS modified with KCLA (left) or KCLA/GO dyadic modifier (right) in 0.1 M  $\text{KNO}_3$  under  $\text{O}_2$ .

The analysis of Fig. S12 and Fig. S13 reveals that cadmium sulphide is affected more by the presence of molecular oxygen in the experimental system than by the addition of graphene oxide. That may indicate a relatively weak interactions between this non-oxide semiconductor and the examined modifiers, probably due to the electronic configuration of cadmium cations and significantly lower concentration of oxygen-containing groups on the surface of CdS.



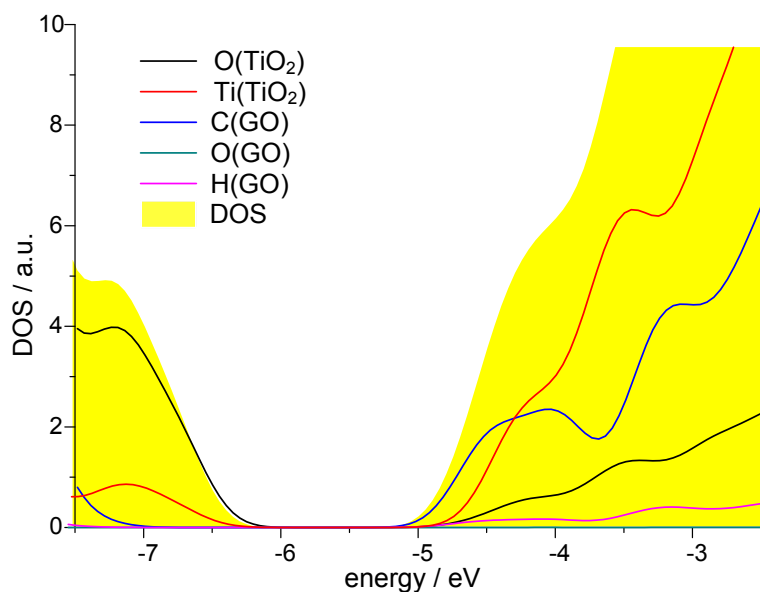

**Figure S14.** Density of states calculated for the TiO<sub>2</sub>-graphene oxide hybrid of the stoichiometry Ti<sub>56</sub>O<sub>112</sub>C<sub>260</sub>O<sub>54</sub>H<sub>40</sub> at the PM7 level of theory with MOPAC2012, version 15.286W (yellow area). Lines represent projected density of states for corresponding fragments.

## References

1. J. I. Paredes, S. Villar-Rodil, A. Martinez-Alonso and J. M. D. Tascon, *Langmuir* 2008, **24**, 10560–10564.
2. S. Stankovich, R. D. Piner, S. T. Nguyen and R. S. Ruoff, *Carbon*, 2006, **44**, 3342–3347.
3. A. Pawlukoje, G. Bator, L. Sobczyk, E. Grech and J. Nowicka-Scheibe, *J. Phys. Org. Chem.*, 2003, **16**, 709–714.
